# Supplementary material for: 1, 2-, 1, 3- and 1, 4-Cyclohexanedicarboxylates of Cd and Mn with chain and layered structures
Source: Royal Society of Chemistry journal article supplement (doi:10.1039/b512843a), 2005-12-15
Supplement: b512843a.pdf [file b512843a.pdf]

**1, 2-, 1, 3- and 1, 4-Cyclohexanedicarboxylates of Cd and Mn**  
**with chain and layered structures**

**A. Thirumurugan, M. B. Avinash and C. N. R. Rao\***

*Chemistry and Physics of Materials Unit, Jawaharlal Nehru Centre for Advanced*

*Scientific Research, Jakkur P. O., Bangalore 560064, India*

**Electronic Supplementary Information**

**Table S1.** Selected bond distances and angles for **I**

| Bond         | Distance (Å) | Bond                | Amplitude |
|--------------|--------------|---------------------|-----------|
| Cd(1)-O(1)   | 2.295(4)     | O(1)-Cd(1)-O(1)#1   | 94.2(2)   |
| Cd(1)-O(1)#1 | 2.295(4)     | O(1)-Cd(1)-O(2)     | 55.22(14) |
| Cd(1)-O(2)   | 2.404(4)     | O(1)-Cd(1)-O(2)#1   | 93.9(2)   |
| Cd(1)-O(2)#1 | 2.404(4)     | O(3)-Cd(1)-O(1)     | 105.2(2)  |
| Cd(1)-O(3)   | 2.239(4)     | O(3)#1-Cd(1)-O(1)   | 139.5(2)  |
| Cd(1)-O(3)#1 | 2.239(4)     | O(1)#1-Cd(1)-O(2)   | 93.9(2)   |
| O(1)-C(1)    | 2.256(8)     | O(1)#1-Cd(1)-O(2)#1 | 55.22(14) |
| O(2)-C(1)    | 1.260(7)     | O(3)-Cd(1)-O(1)#1   | 139.5(2)  |
|              |              | O(3)#1-Cd(1)-O(1)#1 | 105.2(2)  |
|              |              | O(2)-Cd(1)-O(2)#1   | 136.6(2)  |
|              |              | O(3)-Cd(1)-O(2)     | 126.4(2)  |
|              |              | O(3)#1-Cd(1)-O(2)   | 87.8(2)   |
|              |              | O(3)-Cd(1)-O(2)#1   | 87.8(2)   |
|              |              | O(3)#1-Cd(1)-O(2)#1 | 126.4(2)  |
|              |              | O(3)#1-Cd(1)-O(3)   | 82.6(3)   |

Symmetry transformations used to generate equivalent atoms: #1 -x+1,y,-z+1/2

**Table S2.** Selected bond distances and angles for **II**

| Bond         | Distance (Å) | Bond              | Amplitude  |
|--------------|--------------|-------------------|------------|
| Cd(1)-O(1)   | 2.420(3)     | O(1)-Cd(1)-O(2)   | 53.97(11)  |
| Cd(1)-O(2)   | 2.345(3)     | O(1)-Cd(1)-O(3)   | 112.91(12) |
| Cd(1)-O(3)   | 2.424(3)     | O(1)-Cd(1)-O(4)   | 85.80(11)  |
| Cd(1)-O(4)   | 2.624(3)     | O(1)-Cd(1)-O(3)#1 | 92.13(11)  |
| Cd(1)-O(3)#1 | 2.269(3)     | O(2)-Cd(1)-O(3)   | 81.40(12)  |
| Cd(1)#1-O(3) | 2.269(3)     | O(2)-Cd(1)-O(4)   | 139.74(11) |
| Cd(1)-N(1)   | 2.342(3)     | O(2)-Cd(1)-O(3)#1 | 122.59(12) |
| Cd(1)-N(2)   | 2.359(3)     | O(3)-Cd(1)-O(4)   | 121.05(9)  |
| O(1)-C(11)   | 1.239(5)     | O(3)-Cd(1)-O(3)#1 | 71.04(11)  |
| O(2)-C(11)   | 1.249(5)     | O(4)-Cd(1)-O(3)#1 | 52.09(9)   |
| O(3)-C(18)   | 1.263(5)     | N(1)-Cd(1)-O(1)   | 162.07(12) |
| C(18)-O(4)#1 | 1.243(5)     | N(1)-Cd(1)-O(2)   | 123.37(11) |
| O(4)-C(18)#1 | 1.243(5)     | N(1)-Cd(1)-O(3)   | 82.42(11)  |
|              |              | N(1)-Cd(1)-O(4)   | 94.23(10)  |
|              |              | N(1)-Cd(1)-O(3)#1 | 102.04(11) |
|              |              | N(2)-Cd(1)-O(1)   | 91.99(12)  |
|              |              | N(2)-Cd(1)-O(2)   | 88.98(12)  |
|              |              | N(2)-Cd(1)-O(3)   | 139.14(11) |
|              |              | N(2)-Cd(1)-O(4)   | 91.37(10)  |
|              |              | N(2)-Cd(1)-O(3)#1 | 142.74(11) |
|              |              | N(1)-Cd(1)-N(2)   | 70.08(11)  |
|              |              | O(1)-C(11)-O(2)   | 120.7(4)   |
|              |              | O(4)#1-C(18)-O(3) | 120.2(4)   |

Symmetry transformations used to generate equivalent atoms: #1 -x+1/2,-y+3/2,-z+1

**Table S3.** Selected bond distances and angles for **III**

| Bond         | Distance (Å) | Bond                | Amplitude |
|--------------|--------------|---------------------|-----------|
| Cd(1)-O(2)   | 2.325(2)     | O(2)-Cd(1)-O(2)#1   | 180.0     |
| Cd(1)-O(2)#1 | 2.325(2)     | O(2)-Cd(1)-O(3)     | 97.62(9)  |
| Cd(1)-O(3)   | 2.280(2)     | O(2)-Cd(1)-O(3)#1   | 82.38(9)  |
| Cd(1)-O(3)#1 | 2.280(2)     | O(2)-Cd(1)-O(6)     | 90.26(8)  |
| Cd(1)-O(6)   | 2.240(2)     | O(2)-Cd(1)-O(6)#1   | 89.74(8)  |
| Cd(1)-O(6)#1 | 2.240(2)     | O(2)#1-Cd(1)-O(3)   | 82.38(9)  |
| Cd(2)-O(1)   | 2.339(2)     | O(2)#1-Cd(1)-O(3)#1 | 97.62(9)  |
| Cd(2)-O(2)#1 | 2.487(2)     | O(2)#1-Cd(1)-O(6)   | 89.74(8)  |
| Cd(2)-O(3)   | 2.602(3)     | O(2)#1-Cd(1)-O(6)#1 | 90.26(8)  |
| Cd(2)-O(4)   | 2.328(2)     | O(3)-Cd(1)-O(3)#1   | 180.0     |
| Cd(2)-O(5)   | 2.252(2)     | O(3)-Cd(1)-O(6)     | 91.27(9)  |
| Cd(2)-N(1)   | 2.379(2)     | O(3)-Cd(1)-O(6)#1   | 88.73(9)  |
| Cd(2)-N(2)   | 2.331(2)     | O(3)#1-Cd(1)-O(6)   | 88.73(9)  |
| O(1)-C(21)   | 1.243(4)     | O(3)#1-Cd(1)-O(6)#1 | 91.27(9)  |
| C(21)-O(2)#1 | 1.269(3)     | O(6)-Cd(1)-O(6)#1   | 180.0     |
| O(2)-C(21)#1 | 1.269(3)     | O(1)-Cd(2)-O(2)#1   | 53.55(7)  |
| O(3)-C(28)   | 1.234(4)     | O(1)-Cd(2)-O(3)     | 93.48(9)  |
| O(4)-C(28)   | 1.245(4)     | O(1)-Cd(2)-O(4)     | 91.30(9)  |
| O(5)-C(41)   | 1.245(4)     | O(1)-Cd(2)-O(5)     | 159.70(8) |
| O(6)-C(41)   | 1.259(4)     | O(2)#1-Cd(2)-O(3)   | 73.11(7)  |
|              |              | O(2)#1-Cd(2)-O(4)   | 112.54(8) |
|              |              | O(2)#1-Cd(2)-O(5)   | 106.28(7) |
|              |              | O(3)-Cd(2)-O(4)     | 51.39(8)  |
|              |              | O(3)-Cd(2)-O(5)     | 80.93(8)  |
|              |              | O(4)-Cd(2)-O(5)     | 100.09(8) |
|              |              | N(1)-Cd(2)-O(1)     | 91.81(9)  |
|              |              | N(1)-Cd(2)-O(2)#1   | 86.18(8)  |
|              |              | N(1)-Cd(2)-O(3)     | 149.44(8) |
|              |              | N(1)-Cd(2)-O(4)     | 158.49(9) |
|              |              | N(1)-Cd(2)-O(5)     | 83.74(8)  |
|              |              | N(2)-Cd(2)-O(1)     | 93.47(8)  |
|              |              | N(2)-Cd(1)-O(2)#1   | 139.83(7) |
|              |              | N(2)-Cd(2)-O(3)     | 138.36(8) |
|              |              | N(2)-Cd(2)-O(4)     | 87.45(9)  |
|              |              | N(2)-Cd(2)-O(5)     | 103.70(8) |
|              |              | N(1)-Cd(2)-N(2)     | 71.12(9)  |
|              |              | O(1)-C(21)-O(2)#1   | 120.2(3)  |
|              |              | O(3)-C(28)-O(4)     | 120.5(3)  |
|              |              | O(5)-C(41)-O(6)     | 126.1(3)  |

Symmetry transformations used to generate equivalent atoms: #1 -x,-y,-z+1

**Table S4.** Selected bond distances and angles for **IV**

| Bond         | Distance (Å) | Bond                | Amplitude |
|--------------|--------------|---------------------|-----------|
| Mn(1)-O(1)   | 2.226(2)     | O(1)-Mn(1)-O(1)#2   | 180.0     |
| Mn(1)-O(1)#2 | 2.226(2)     | O(1)-Mn(1)-O(3)     | 85.43(7)  |
| Mn(1)-O(3)   | 2.145(2)     | O(1)-Mn(1)-O(3)#2   | 94.57(7)  |
| Mn(1)-O(3)#2 | 2.145(2)     | O(1)-Mn(1)-O(5)     | 90.77(6)  |
| Mn(1)-O(5)   | 2.1501(14)   | O(1)-Mn(1)-O(5)#2   | 89.23(6)  |
| Mn(1)-O(5)#2 | 2.1501(14)   | O(1)#2-Mn(1)-O(3)   | 94.57(7)  |
| Mn(2)-O(1)#2 | 2.371(2)     | O(1)#2-Mn(1)-O(3)#2 | 85.43(7)  |
| Mn(2)-O(2)#2 | 2.239(2)     | O(1)#2-Mn(1)-O(5)   | 89.23(6)  |
| O(4)-Mn(2)   | 2.155(2)     | O(1)#2-Mn(1)-O(5)#2 | 90.77(6)  |
| O(6)-Mn(2)   | 2.121(2)     | O(3)-Mn(1)-O(3)#2   | 180.0     |
| Mn(2)-N(1)   | 2.299(2)     | O(3)-Mn(1)-O(5)     | 88.46(6)  |
| Mn(2)-N(2)   | 2.247(2)     | O(3)-Mn(1)-O(5)#2   | 91.54(6)  |
| O(1)-C(21)   | 1.259(2)     | O(3)#2-Mn(1)-O(5)   | 91.54(6)  |
| C(21)-O(2)   | 1.259(2)     | O(3)#2-Mn(1)-O(5)#2 | 88.46(6)  |
| O(3)-C(28)   | 1.241(3)     | O(5)-Mn(1)-O(5)#2   | 180.0     |
| C(28)-O(4)#2 | 1.242(3)     | O(1)#2-Mn(2)-O(2)#2 | 55.82(6)  |
| O(5)-C(31)   | 1.255(2)     | O(1)#2-Mn(2)-O(4)   | 106.73(6) |
| O(6)-C(31)   | 1.257(3)     | O(1)#2-Mn(2)-O(6)   | 106.73(6) |
|              |              | O(2)#2-Mn(2)-O(4)   | 92.35(7)  |
|              |              | O(2)#2-Mn(2)-O(6)   | 161.75(6) |
|              |              | O(4)-Mn(2)-O(6)     | 98.86(7)  |
|              |              | N(1)-Mn(2)-O(1)#2   | 88.00(6)  |
|              |              | N(1)-Mn(2)-O(2)#2   | 89.12(7)  |
|              |              | N(1)-Mn(2)-O(4)     | 162.24(7) |
|              |              | N(1)-Mn(2)-O(6)     | 84.58(6)  |
|              |              | N(2)-Mn(2)-O(1)#2   | 142.27(6) |
|              |              | N(2)-Mn(1)-O(2)#2   | 90.81(7)  |
|              |              | N(2)-Mn(2)-O(4)     | 89.28(7)  |
|              |              | N(2)-Mn(2)-O(6)     | 103.62(6) |
|              |              | N(1)-Mn(2)-N(2)     | 73.00(7)  |
|              |              | O(1)-C(21)-O(2)     | 119.4(2)  |
|              |              | O(3)-C(28)-O(4)#2   | 122.4(2)  |
|              |              | O(5)-C(31)-O(6)     | 124.6(2)  |

Symmetry transformations used to generate equivalent atoms: #2 -x+2,-y,-z+2

**Table S5.** Selected bond distances and angles for **V**

| Bond         | Distance (Å) | Bond                 | Amplitude |
|--------------|--------------|----------------------|-----------|
| Mn(1)-O(2)   | 2.211(4)     | O(2)-Mn(1)-O(2)#1    | 178.9(2)  |
| Mn(1)-O(2)#1 | 2.211(4)     | O(2)-Mn(1)-O(3)      | 85.9(2)   |
| Mn(1)-O(3)   | 2.155(4)     | O(2)-Mn (1)-O(3)#1   | 94.8(2)   |
| Mn(1)-O(3)#1 | 2.155(4)     | O(2)-Mn (1)-O(6)     | 89.8(3)   |
| Mn(1)-O(6)   | 2.141(6)     | O(2)-Mn (1)-O(6)#1   | 89.4(3)   |
| Mn(1)-O(6)#1 | 2.141(6)     | O(2)#1-Mn (1)-O(3)   | 94.8(2)   |
| Mn(2)-O(1)   | 2.424(4)     | O(2)#1-Mn (1)-O(3)#1 | 85.9(2)   |
| Mn(2)-O(2)   | 2.222(4)     | O(2)#1-Mn (1)-O(6)   | 89.4(3)   |
| Mn(2)-O(4)   | 2.107(4)     | O(2)#1-Mn (1)-O(6)#1 | 89.8(3)   |
| Mn(2)-O(5)   | 2.186(5)     | O(3)-Mn (1)-O(3)#1   | 100.9(3)  |
| Mn(2)-N(1)   | 2.255(5)     | O(3)-Mn (1)-O(6)     | 86.8(2)   |
| Mn(2)-N(2)   | 2.245(5)     | O(3)-Mn (1)-O(6)#1   | 171.2(2)  |
| O(1)-C(21)   | 1.252(6)     | O(3) #1-Mn (1)-O(6)  | 171.2(2)  |
| C(21)-O(2)   | 1.269(7)     | O(3)#1-Mn (1)-O(6)#1 | 86.8(2)   |
| O(3)-C(28)   | 1.244(6)     | O(6)-Mn(1)-O(6)#1    | 85.8(4)   |
| C(28)-O(4)   | 1.269(7)     | O(1)-Mn(2)-O(2)      | 55.94(13) |
| O(5)-C(31)   | 1.205(7)     | O(1)-Mn(2)-O(4)      | 86.0(2)   |
| O(6)-C(31)   | 1.204(7)     | O(1)-Mn (2)-O(5)     | 172.8(2)  |
|              |              | O(2)-Mn (2)-O(4)     | 93.8(2)   |
|              |              | O(2)-Mn (2)-O(5)     | 117.8(2)  |
|              |              | O(4)-Mn (2)-O(5)     | 91.3(2)   |
|              |              | N(1)-Mn (2)-O(1)     | 93.0(2)   |
|              |              | N(1)-Mn (2)-O(2)     | 94.8(2)   |
|              |              | N(1)-Mn (2)-O(4)     | 168.8(2)  |
|              |              | N(1)-Mn (2)-O(5)     | 90.9(2)   |
|              |              | N(2)-Mn (2)-O(1)     | 88.11(14) |
|              |              | N(2)-Mn (1)-O(2)     | 142.2(2)  |
|              |              | N(2)-Mn (2)-O(4)     | 95.0(2)   |
|              |              | N(2)-Mn (2)-O(5)     | 98.7(2)   |
|              |              | N(1)-Mn (2)-N(2)     | 73.8(2)   |
|              |              | O(1)-C(21)-O(2)      | 119.6(5)  |
|              |              | O(3)-C(28)-O(4)      | 124.7(5)  |
|              |              | O(5)-C(31)-O(6)      | 123.3(7)  |

Symmetry transformations used to generate equivalent atoms: #1 -x,y,-z+1/2

**Table S6.** Selected bond distances and angles for **VI**

| Bond         | Distance (Å) | Bond              | Amplitude  |
|--------------|--------------|-------------------|------------|
| Cd(1)-O(1)   | 2.258(4)     | O(1)-Cd(1)-O(2)   | 107.37(14) |
| Cd(1)-O(2)   | 2.286(4)     | O(1)-Cd(1)-O(3)   | 78.61(14)  |
| Cd(1)-O(3)   | 2.447(4)     | O(1)-Cd(1)-O(3)#1 | 85.5(2)    |
| Cd(1)-O(4)   | 2.607(4)     | O(1)-Cd(1)-O(4)   | 89.2(2)    |
| Cd(1)-O(5)   | 2.366(4)     | O(1)-Cd(1)-O(5)   | 121.51(14) |
| Cd(1)-O(6)   | 2.428(4)     | O(1)-Cd(1)-O(6)   | 155.84(14) |
| Cd(1)-O(3)#1 | 2.353(4)     | O(2)-Cd(1)-O(3)   | 84.68(13)  |
| O(3)-Cd(1)#1 | 2.353(4)     | O(2)-Cd(1)-O(3)#1 | 150.72(14) |
| O(3)-C(1)    | 1.252(7)     | O(2)-Cd(1)-O(4)   | 150.37(14) |
| C(1)-O(4)#1  | 1.261(7)     | O(2)-Cd(1)-O(5)   | 78.4(2)    |
| O(1)-C(8)    | 1.280(6)     | O(2)-Cd(1)-O(6)   | 82.4(2)    |
| C(8)-O(2)#4  | 1.247(7)     | O(3)-Cd(1)-O(3)#1 | 71.9(2)    |
| O(2)-C(8)#2  | 1.247(7)     | O(3)-Cd(1)-O(4)   | 123.32(12) |
|              |              | O(3)-Cd(1)-O(5)   | 156.80(14) |
|              |              | O(3)-Cd(1)-O(6)   | 80.4(2)    |
|              |              | O(4)-Cd(1)-O(3)#1 | 51.87(13)  |
|              |              | O(4)-Cd(1)-O(5)   | 71.99(14)  |
|              |              | O(4)-Cd(1)-O(6)   | 92.3(2)    |
|              |              | O(5)-Cd(1)-O(3)#1 | 117.8(2)   |
|              |              | O(5)-Cd(1)-O(6)   | 81.7(2)    |
|              |              | O(6)-Cd(1)-O(3)#1 | 76.7(2)    |
|              |              | O(3)-C(1)-O(4)#1  | 120.5(5)   |
|              |              | O(1)-C(8)-O(2)#4  | 121.8(5)   |

Symmetry transformations used to generate equivalent atoms: #1 -x+1,-y+1,-z #4 -x+1/2,y,z-1/2

**Table S7.** Selected bond distances and angles for **VII**

| Bond       | Distance (Å) | Bond            | Amplitude |
|------------|--------------|-----------------|-----------|
| Cd(1)-O(1) | 2.339(4)     | O(1)-Cd(1)-O(2) | 51.66(14) |
| Cd(1)-O(2) | 2.600(5)     | O(1)-Cd(1)-O(3) | 82.7(2)   |
| Cd(1)-O(3) | 2.329(5)     | O(1)-Cd(1)-O(4) | 131.8(2)  |
| Cd(1)-O(4) | 2.384(4)     | O(1)-Cd(1)-O(7) | 108.5(2)  |
| Cd(1)-O(7) | 2.351(4)     | O(2)-Cd(1)-O(3) | 125.9(2)  |
| Cd(1)-N(1) | 2.390(5)     | O(2)-Cd(1)-O(4) | 174.5(2)  |
| Cd(1)-N(2) | 2.362(4)     | O(2)-Cd(1)-O(7) | 72.9(2)   |
| Cd(2)-O(2) | 2.278(4)     | O(3)-Cd(1)-O(4) | 54.5(2)   |
| Cd(2)-O(5) | 2.702(5)     | O(3)-Cd(1)-O(7) | 101.6(2)  |
| Cd(2)-O(6) | 2.233(5)     | O(4)-Cd(1)-O(7) | 101.6(2)  |
| Cd(2)-O(7) | 2.695(4)     | N(1)-Cd(1)-O(1) | 83.0(2)   |
| Cd(2)-O(8) | 2.298(5)     | N(1)-Cd(1)-O(2) | 94.9(2)   |
| Cd(2)-N(3) | 2.403(4)     | N(1)-Cd(1)-O(3) | 108.1(2)  |
| Cd(2)-N(4) | 2.405(4)     | N(1)-Cd(1)-O(4) | 90.0(2)   |
| O(1)-C(41) | 1.222(7)     | N(1)-Cd(1)-O(7) | 149.3(2)  |
| O(2)-C(41) | 1.270(7)     | N(2)-Cd(1)-O(1) | 129.6(2)  |
| O(3)-C(48) | 1.241(8)     | N(2)-Cd(1)-O(2) | 88.25(14) |
| O(4)-C(48) | 1.245(8)     | N(2)-Cd(1)-O(2) | 145.4(2)  |
| O(5)-C(51) | 1.198(8)     | N(2)-Cd(1)-O(4) | 91.0(2)   |
| O(6)-C(51) | 1.245(7)     | N(2)-Cd(1)-O(7) | 81.2(2)   |
| O(7)-C(58) | 1.233(7)     | N(1)-Cd(1)-N(2) | 70.13(14) |
| O(8)-C(58) | 1.251(7)     | O(2)-Cd(2)-O(5) | 95.4(2)   |
|            |              | O(2)-Cd(2)-O(6) | 107.2(2)  |
|            |              | O(2)-Cd(2)-O(7) | 72.2(1)   |
|            |              | O(2)-Cd(2)-O(8) | 106.0(2)  |
|            |              | O(5)-Cd(2)-O(6) | 49.9(3)   |
|            |              | O(5)-Cd(2)-O(7) | 123.1(2)  |
|            |              | O(5)-Cd(2)-O(8) | 84.4(2)   |
|            |              | O(6)-Cd(2)-O(7) | 173.1(1)  |
|            |              | O(6)-Cd(2)-O(8) | 124.9(2)  |
|            |              | O(7)-Cd(2)-O(8) | 49.9(1)   |
|            |              | N(3)-Cd(2)-O(2) | 83.6(2)   |
|            |              | N(3)-Cd(2)-O(5) | 135.6(4)  |
|            |              | N(3)-Cd(2)-O(6) | 87.9(2)   |
|            |              | N(3)-Cd(2)-O(7) | 98.3(2)   |
|            |              | N(3)-Cd(2)-O(8) | 83.6(2)   |
|            |              | N(4)-Cd(2)-O(2) | 145.9(2)  |
|            |              | N(4)-Cd(2)-O(5) | 118.4(2)  |
|            |              | N(4)-Cd(2)-O(6) | 92.6(2)   |
|            |              | N(4)-Cd(2)-O(7) | 91.3(3)   |
|            |              | N(4)-Cd(2)-O(8) | 83.2(2)   |
|            |              | N(3)-Cd(2)-N(4) | 69.4(2)   |

**Table S8.** Selected bond distances and angles for **VIII**

| Bond       | Distance (Å) | Bond            | Amplitude |
|------------|--------------|-----------------|-----------|
| Mn(1)-O(1) | 2.256(4)     | O(1)-Mn(1)-O(2) | 57.5(2)   |
| Mn(1)-O(2) | 2.264(4)     | O(1)-Mn(1)-O(3) | 92.7(2)   |
| Mn(1)-O(3) | 2.097(4)     | O(1)-Mn(1)-O(5) | 151.7(2)  |
| Mn(1)-O(5) | 2.161(4)     | O(2)-Mn(1)-O(3) | 102.5(2)  |
| Mn(1)-N(1) | 2.244(5)     | O(2)-Mn(1)-O(5) | 94.5(2)   |
| Mn(1)-N(2) | 2.265(5)     | O(3)-Mn(1)-O(5) | 90.0(2)   |
| C(21)-O(1) | 1.245(7)     | N(1)-Mn(1)-O(1) | 99.7(2)   |
| C(21)-O(2) | 1.256(7)     | N(1)-Mn(1)-O(2) | 152.4(2)  |
| C(28)-O(3) | 1.245(8)     | N(1)-Mn(1)-O(3) | 93.3(2)   |
| C(28)-O(4) | 1.247(8)     | N(1)-Mn(1)-O(5) | 108.2(2)  |
|            |              | N(2)-Mn(1)-O(1) | 92.1(2)   |
|            |              | N(2)-Mn(1)-O(2) | 90.7(2)   |
|            |              | N(2)-Mn(1)-O(3) | 166.5(2)  |
|            |              | N(2)-Mn(1)-O(5) | 91.8(2)   |
|            |              | N(1)-Mn(1)-N(2) | 73.4(2)   |
|            |              | O(1)-C(21)-O(2) | 120.8(6)  |
|            |              | O(3)-C(28)-O(4) | 125.4(6)  |

**Table S9.** Selected bond distances and angles for **IX**

| Bond         | Distance (Å) | Bond                | Amplitude |
|--------------|--------------|---------------------|-----------|
| O(1)-Cd(1)   | 2.250(7)     | O(1)-Cd(1)-O(1)#2   | 105.3(2)  |
| Cd(1)-O(1)#2 | 2.404(7)     | O(1)-Cd(1)-O(2)#1   | 97.5(3)   |
| Cd(1)-O(2)#1 | 2.227(7)     | O(1)-Cd(1)-O(3)#2   | 163.3(3)  |
| Cd(1)-O(3)#2 | 2.413(6)     | O(1)-Cd(1)-O(3)#5   | 86.2(3)   |
| Cd(1)-O(3)#5 | 2.271(7)     | O(1)-Cd(1)-O(4)#6   | 104.8(3)  |
| Cd(1)-O(4)#6 | 2.298(7)     | O(1)#2-Cd(1)-O(2)#1 | 82.0(2)   |
| C(7)-O(1)    | 1.261(12)    | O(1)#2-Cd(1)-O(3)#2 | 91.4(2)   |
| C(7)-O(2)    | 1.246(11)    | O(1)#2-Cd(1)-O(3)#5 | 162.6(3)  |
| C(8)-O(3)    | 1.293(12)    | O(1)#2-Cd(1)-O(4)#6 | 71.2(2)   |
| C(8)-O(4)    | 1.248(12)    | O(2)#1-Cd(1)-O(3)#2 | 85.0(3)   |
|              |              | O(2)#1-Cd(1)-O(3)#5 | 110.0(3)  |
|              |              | O(2)#1-Cd(1)-O(4)#6 | 148.7(3)  |
|              |              | O(3)#2-Cd(1)-O(3)#5 | 77.5(3)   |
|              |              | O(3)#2-Cd(1)-O(4)#6 | 79.9(3)   |
|              |              | O(3)#5-Cd(1)-O(4)#6 | 93.3(3)   |
|              |              | O(1)-C(7)-O(2)      | 124.0(10) |
|              |              | O(3)-C(8)-O(4)      | 119.8(9)  |

Symmetry transformations used to generate equivalent atoms: #1 -x+1/2,y+1/2,-z+3/2 #2 -x+1/2,y-1/2,-z+3/2 #3 x,-y+1,z+1/2 #4 x,-y,z+1/2



**Fig S1:** Plots of experimental  $\mu_{\text{eff}}$  vs  $T$  ( $\square$ ) and  $1/\chi_m$  vs  $T$  ( $\circ$ ) of (a) **IV** (b) **V** and (c) **VIII**. The solid line shows the Curie-Weiss fitting.

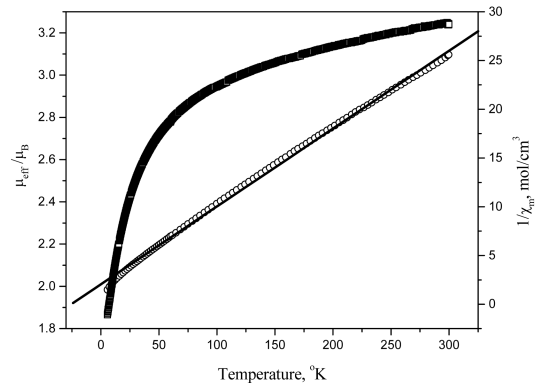

**(a)**

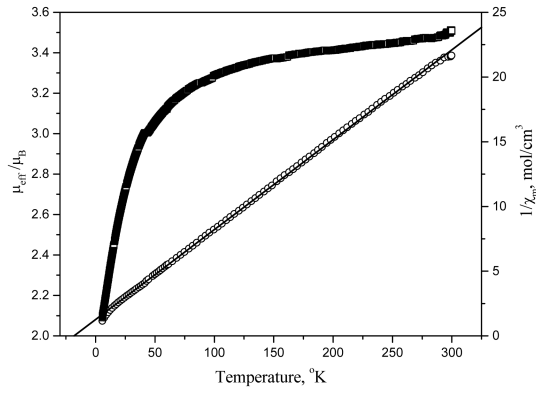

**(b)**

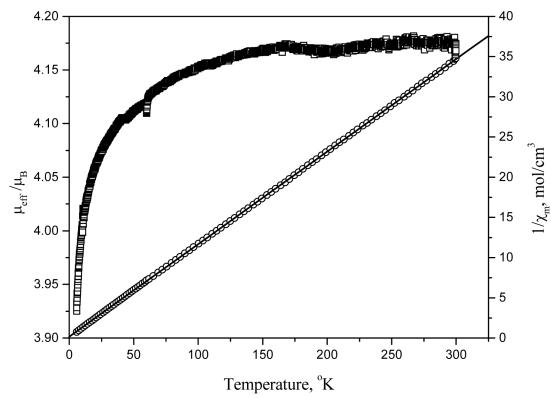

**(c)**

**Fig. S2:** Photoluminescence spectra of (a) **I**, (b) **II**, (c) **III**, (d) **IV**, (e) **V**, (f) **VI**, (g) **VII**, (h) **VIII** and (i) **IX**

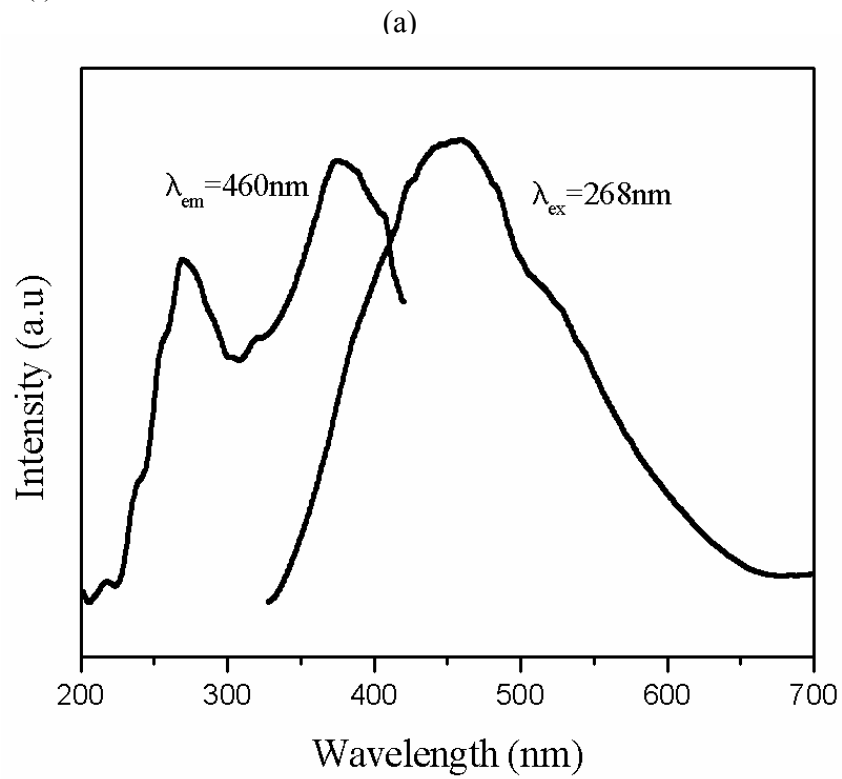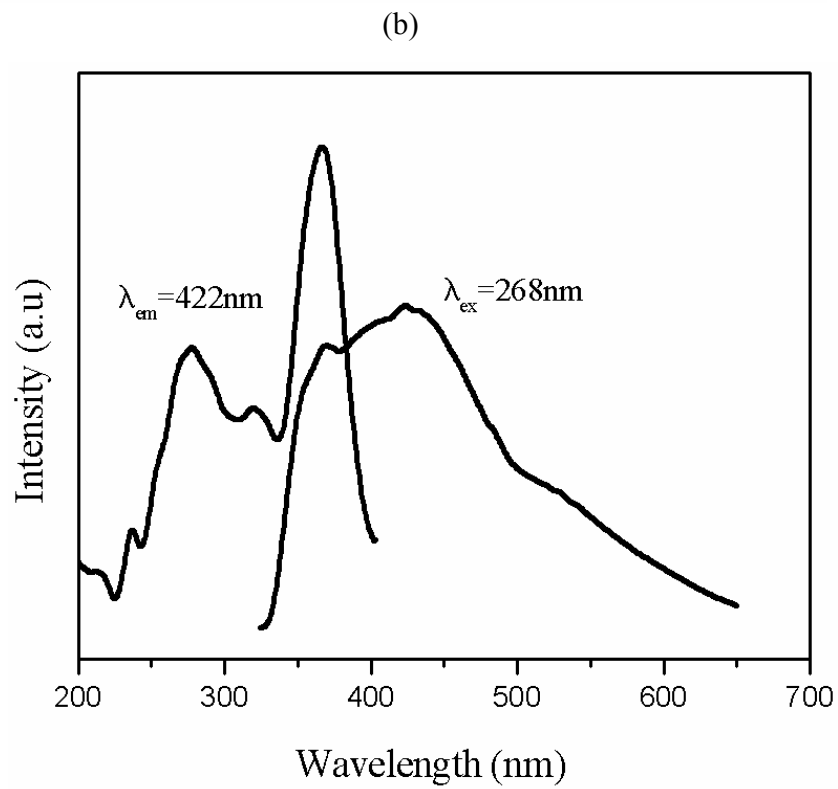

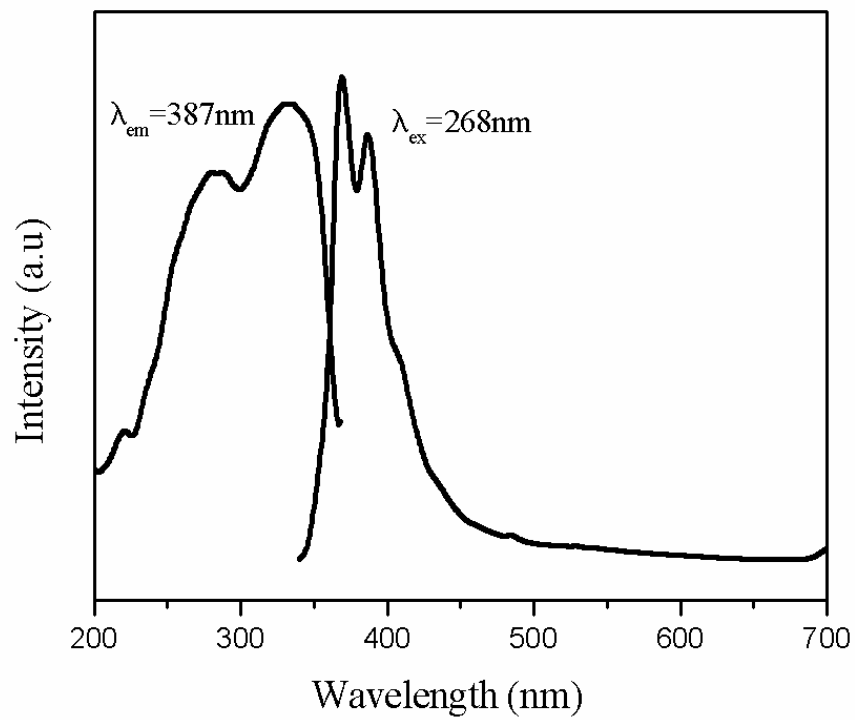

(c)

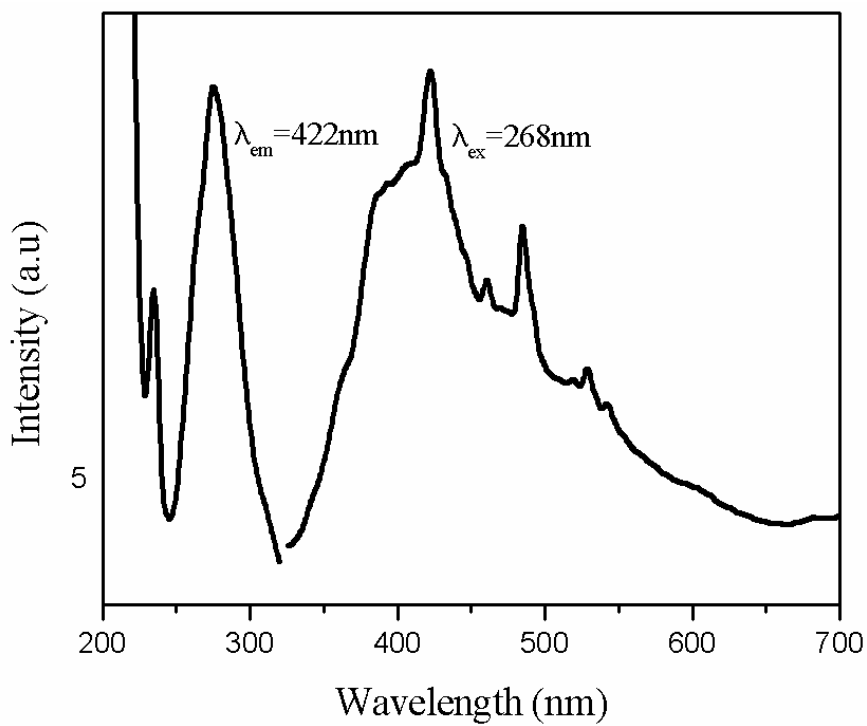

(d)

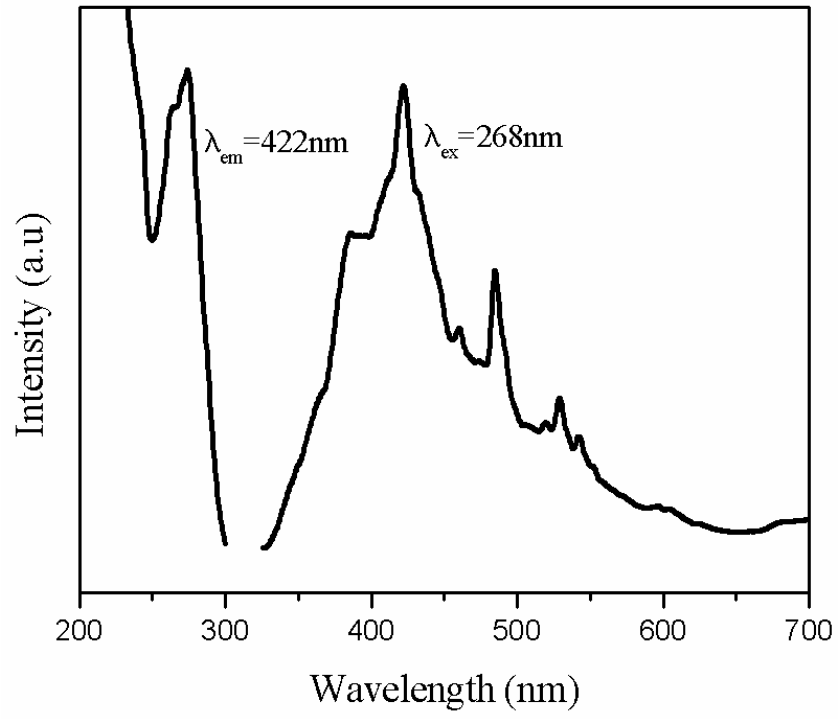

(e)

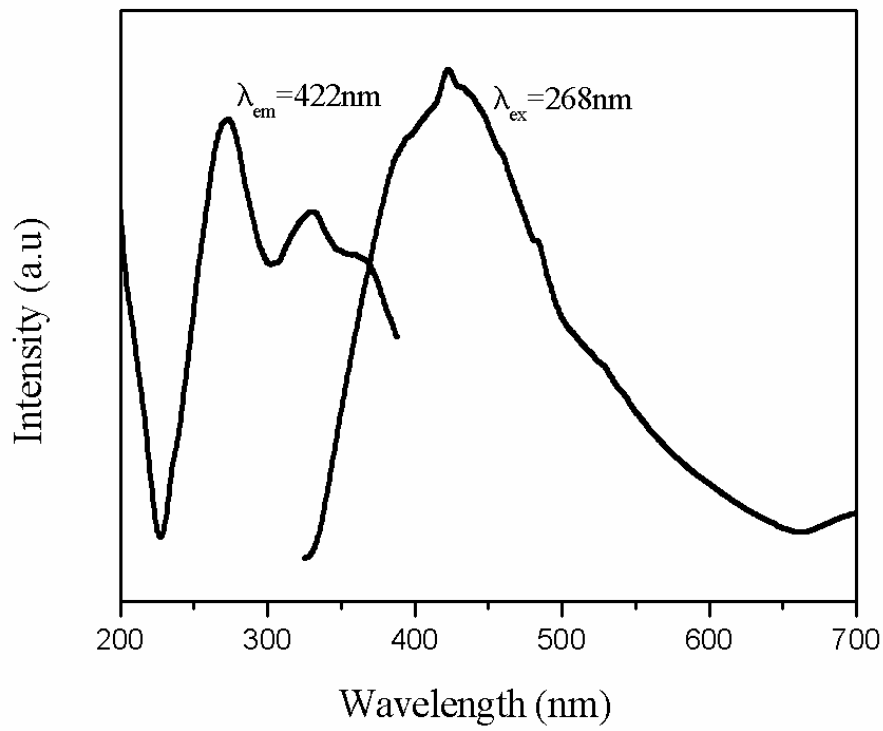

(f)

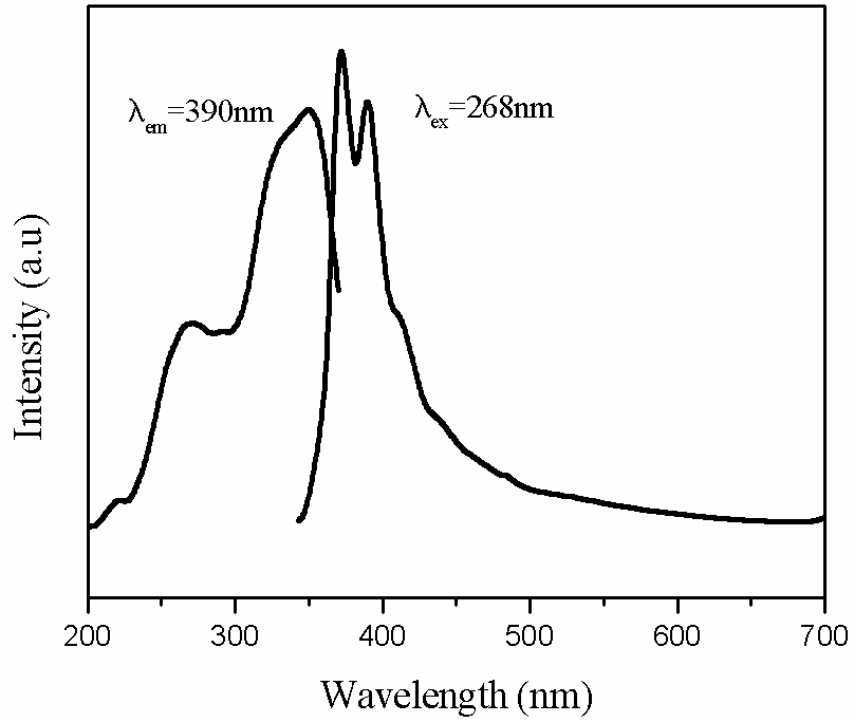

(g)

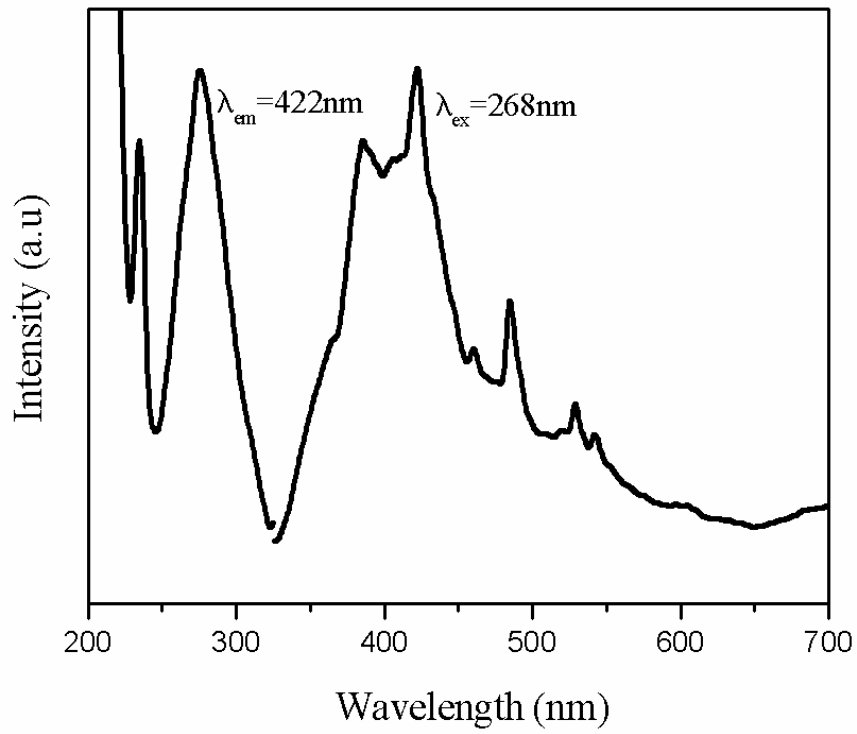

(h)

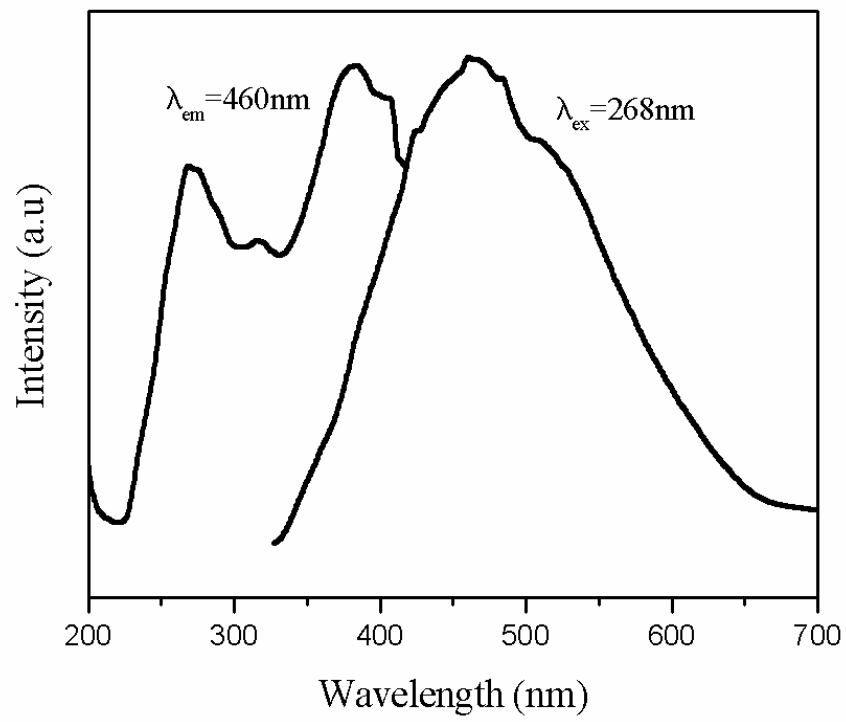

(i)
